# Supplementary material for: Cache Domains That are Homologous to, but Different from PAS Domains Comprise the Largest Superfamily of Extracellular Sensors in Prokaryotes
Source: PubMed Central journal article supplement (PMC4822843; doi:10.1371/journal.pcbi.1004862), 2016-04-06

dCache\_1

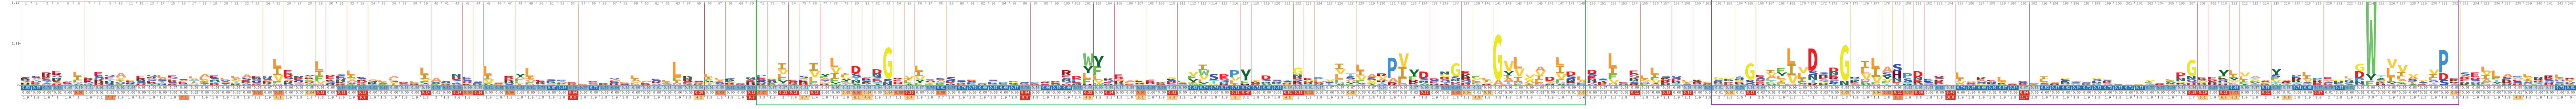

dCache\_2

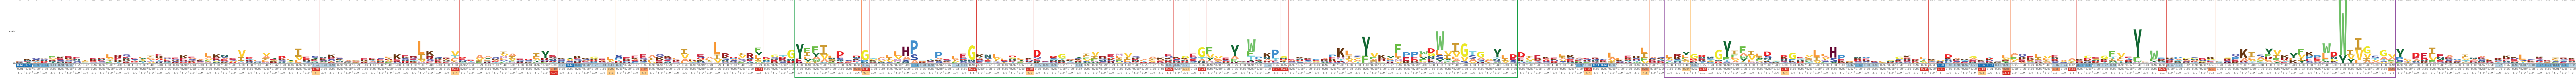

dCache\_3

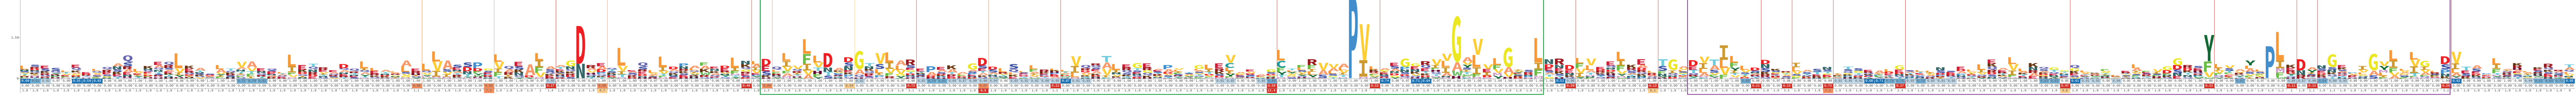

Cache\_3-Cache\_2

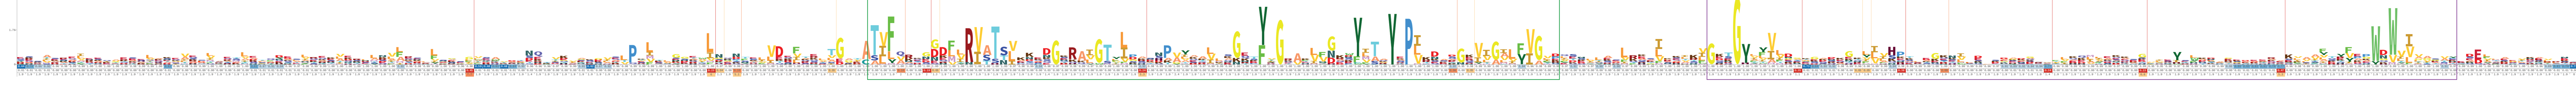

sCache\_2

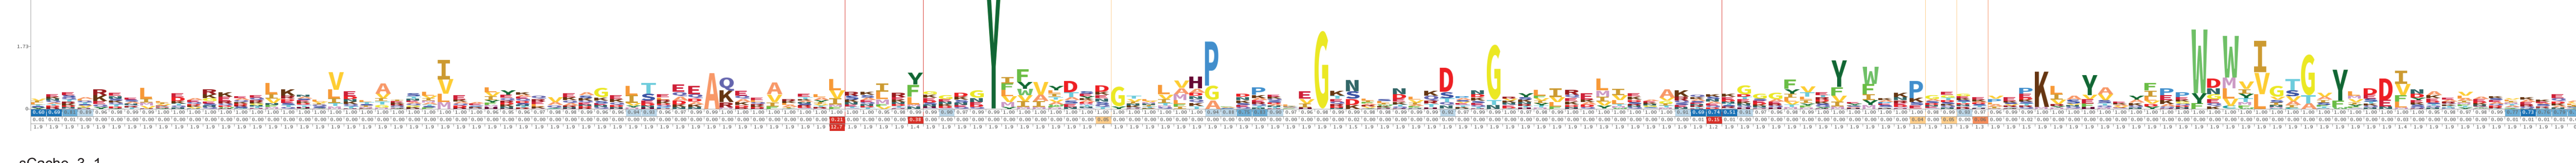

sCache\_3\_1

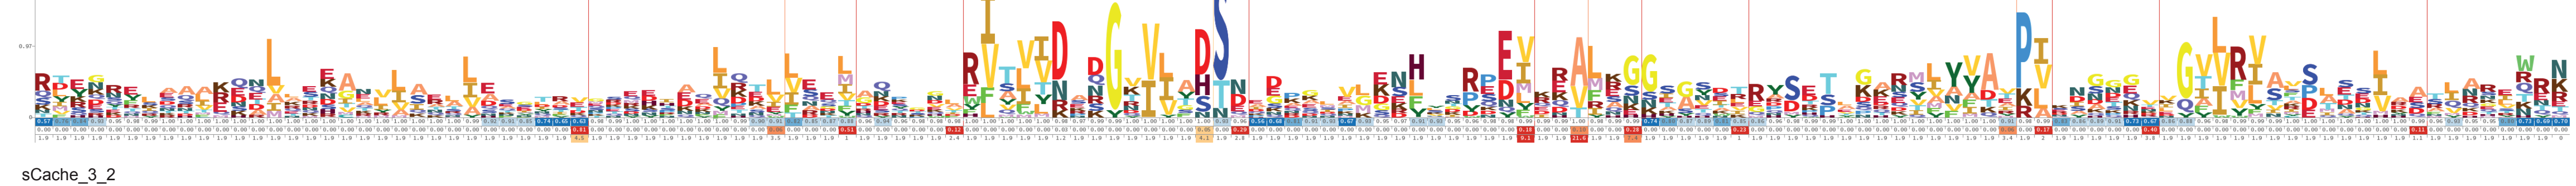

sCache\_3\_2

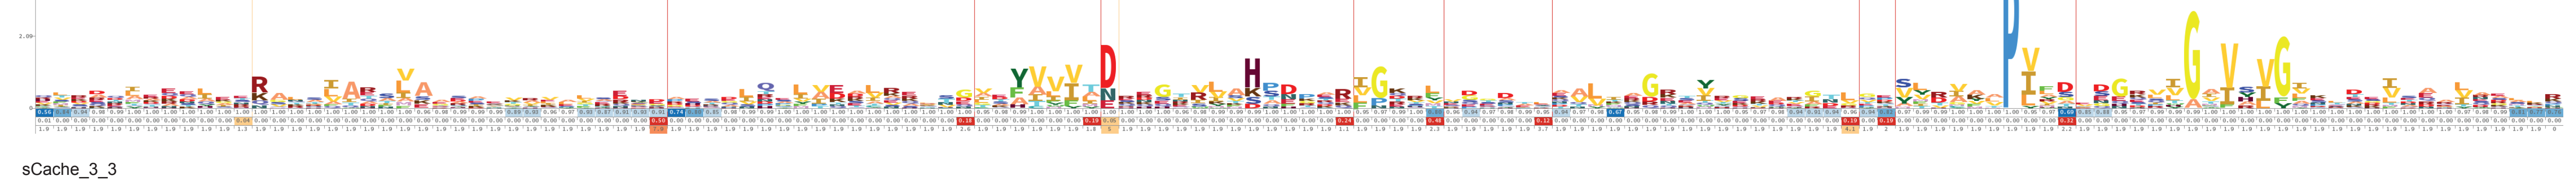

sCache\_3\_3

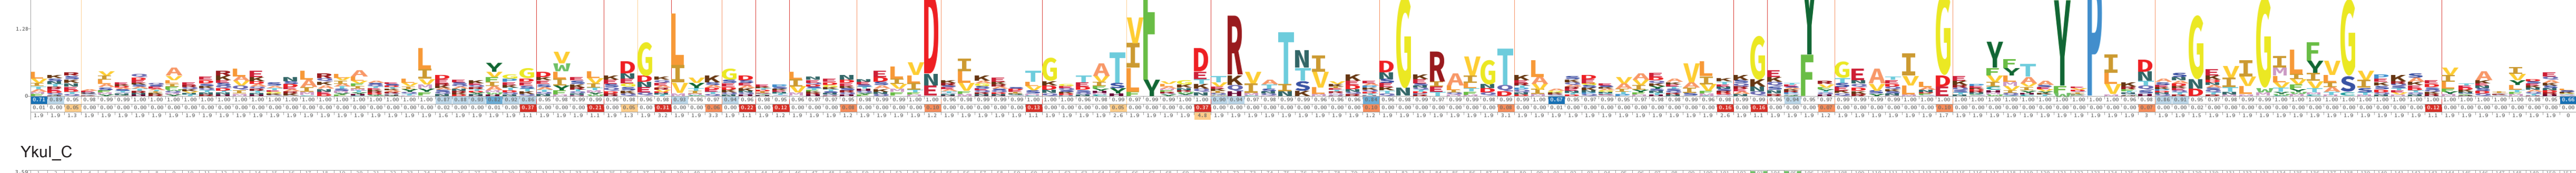

Yku1\_C

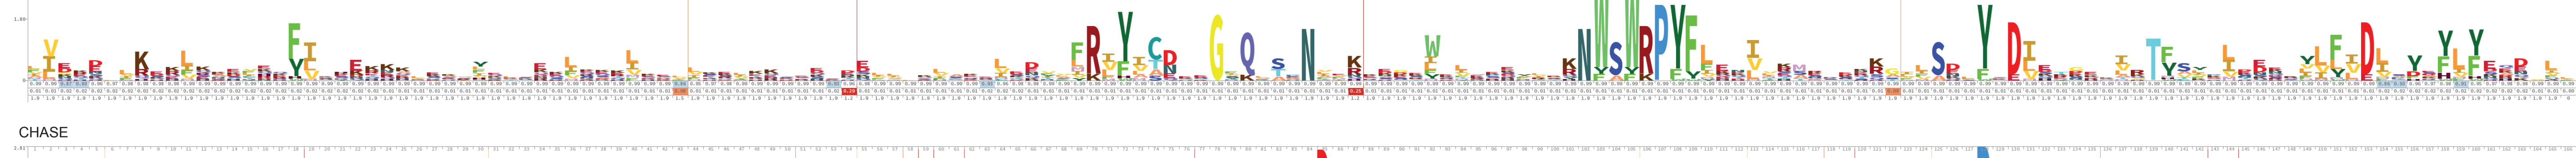

CHASE

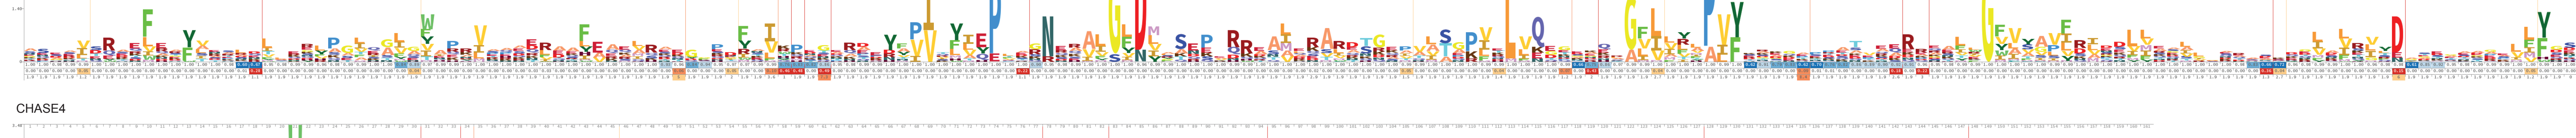

CHASE4

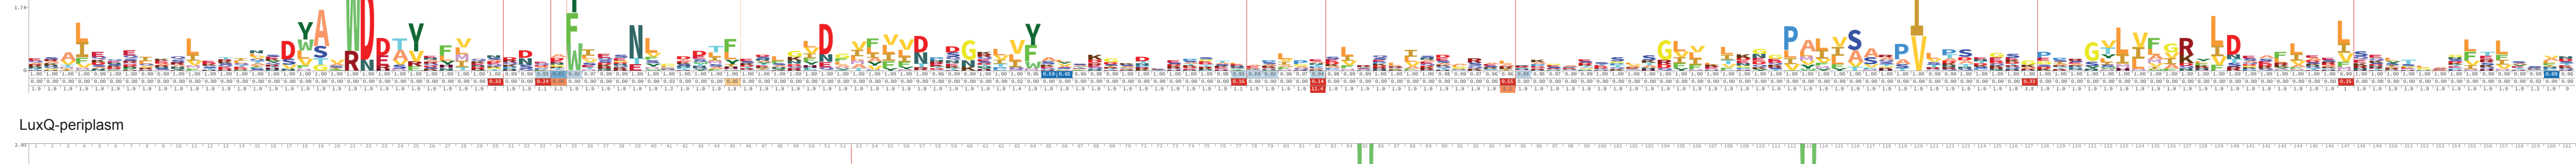

LuxQ-periplasm

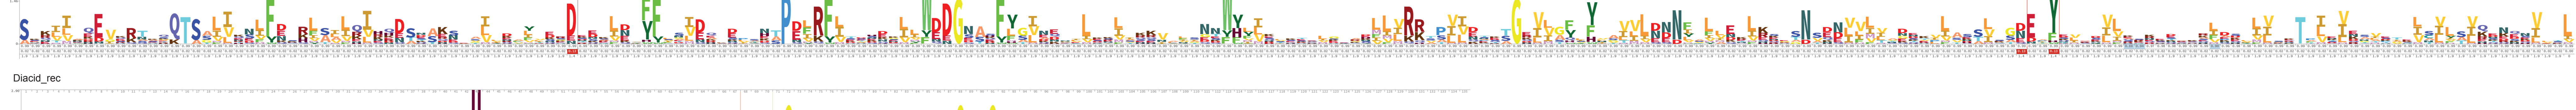

Diad1\_rec

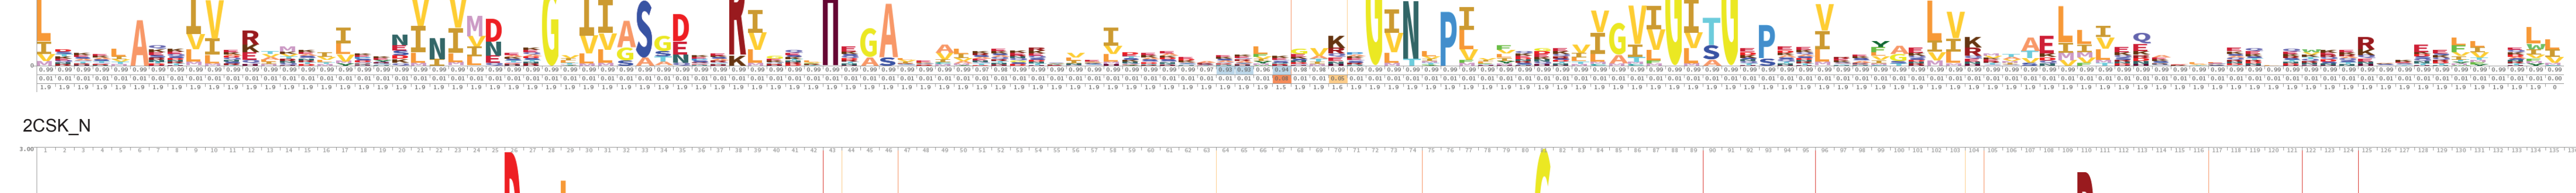

ZCSK\_N

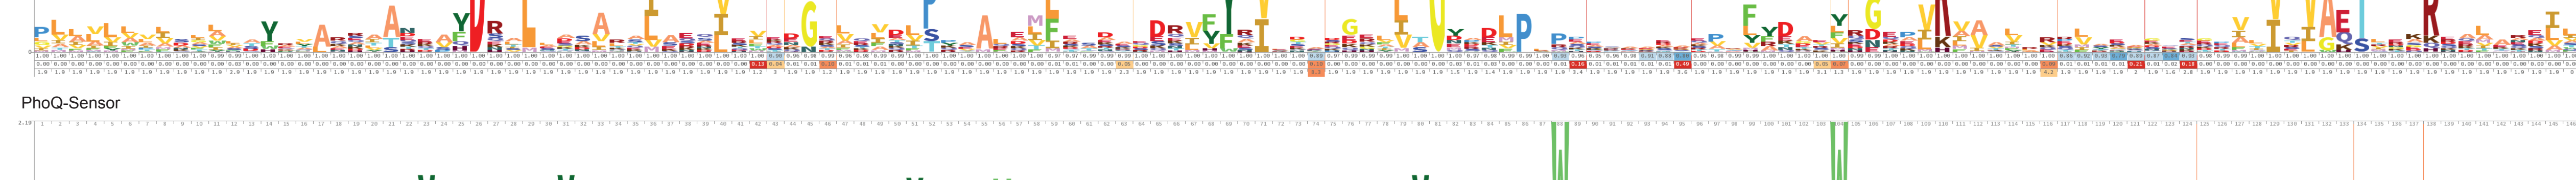

PhoQ-Sensor

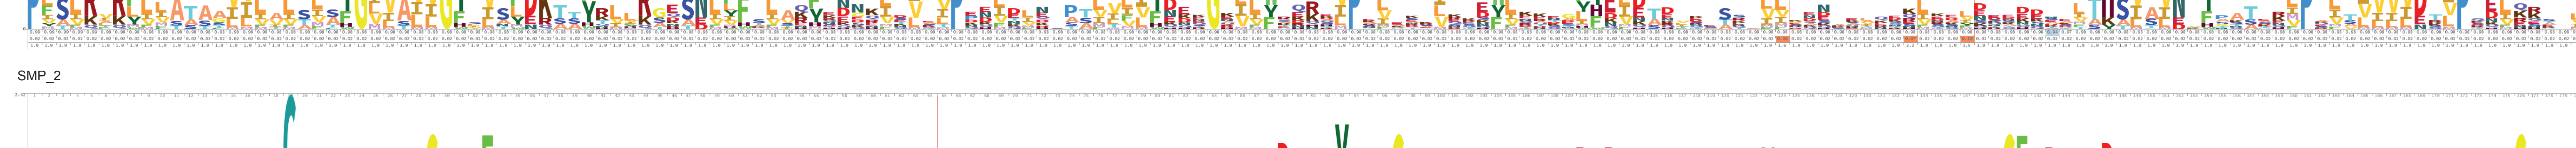

SMP\_2

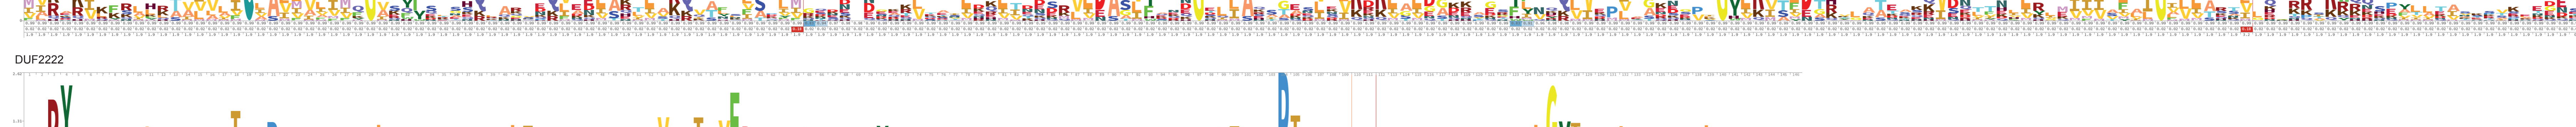

DUF2222

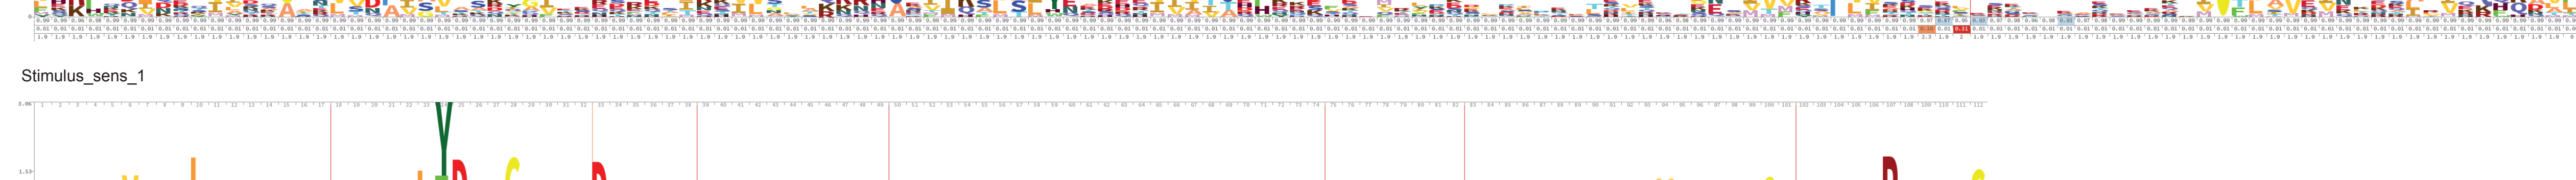

Stimulus\_sens\_1

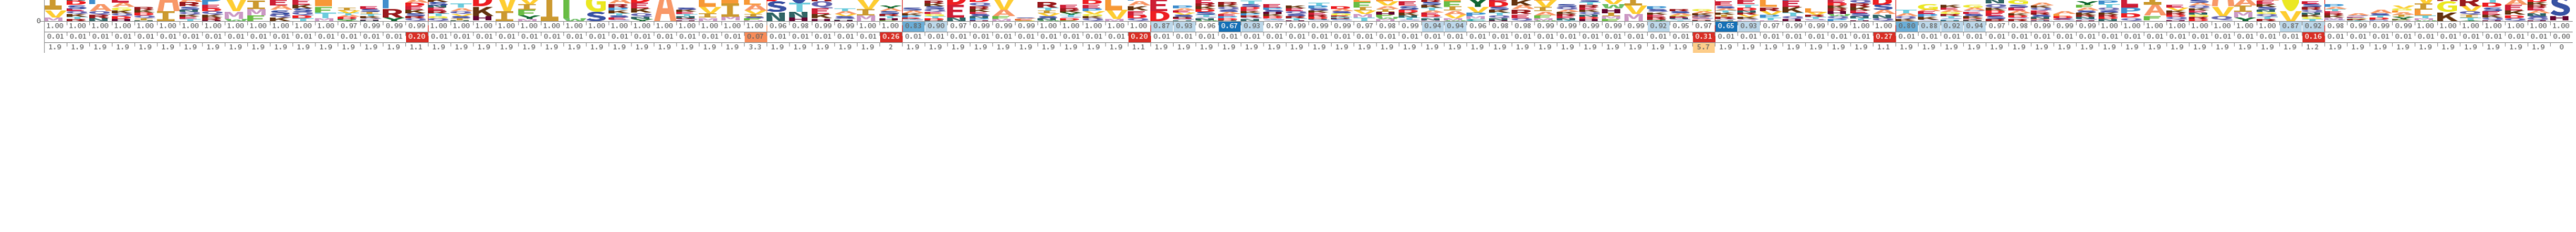

Supplement: pcbi.1004862.s023.pdf [file pcbi.1004862.s023.pdf]
